# Supplementary material for: Cholesterol orchestrates skin fibrosis via the CH25H-CYP7B1-SMAD2/3 axis
Source: Research Square preprint supplement (doi:10.21203/rs.3.rs-8366356/v1), 2026-02-04
Supplement: Supplementary file 1 [file 91b0e2c25f4fafee6c3d24b5.docx]

**
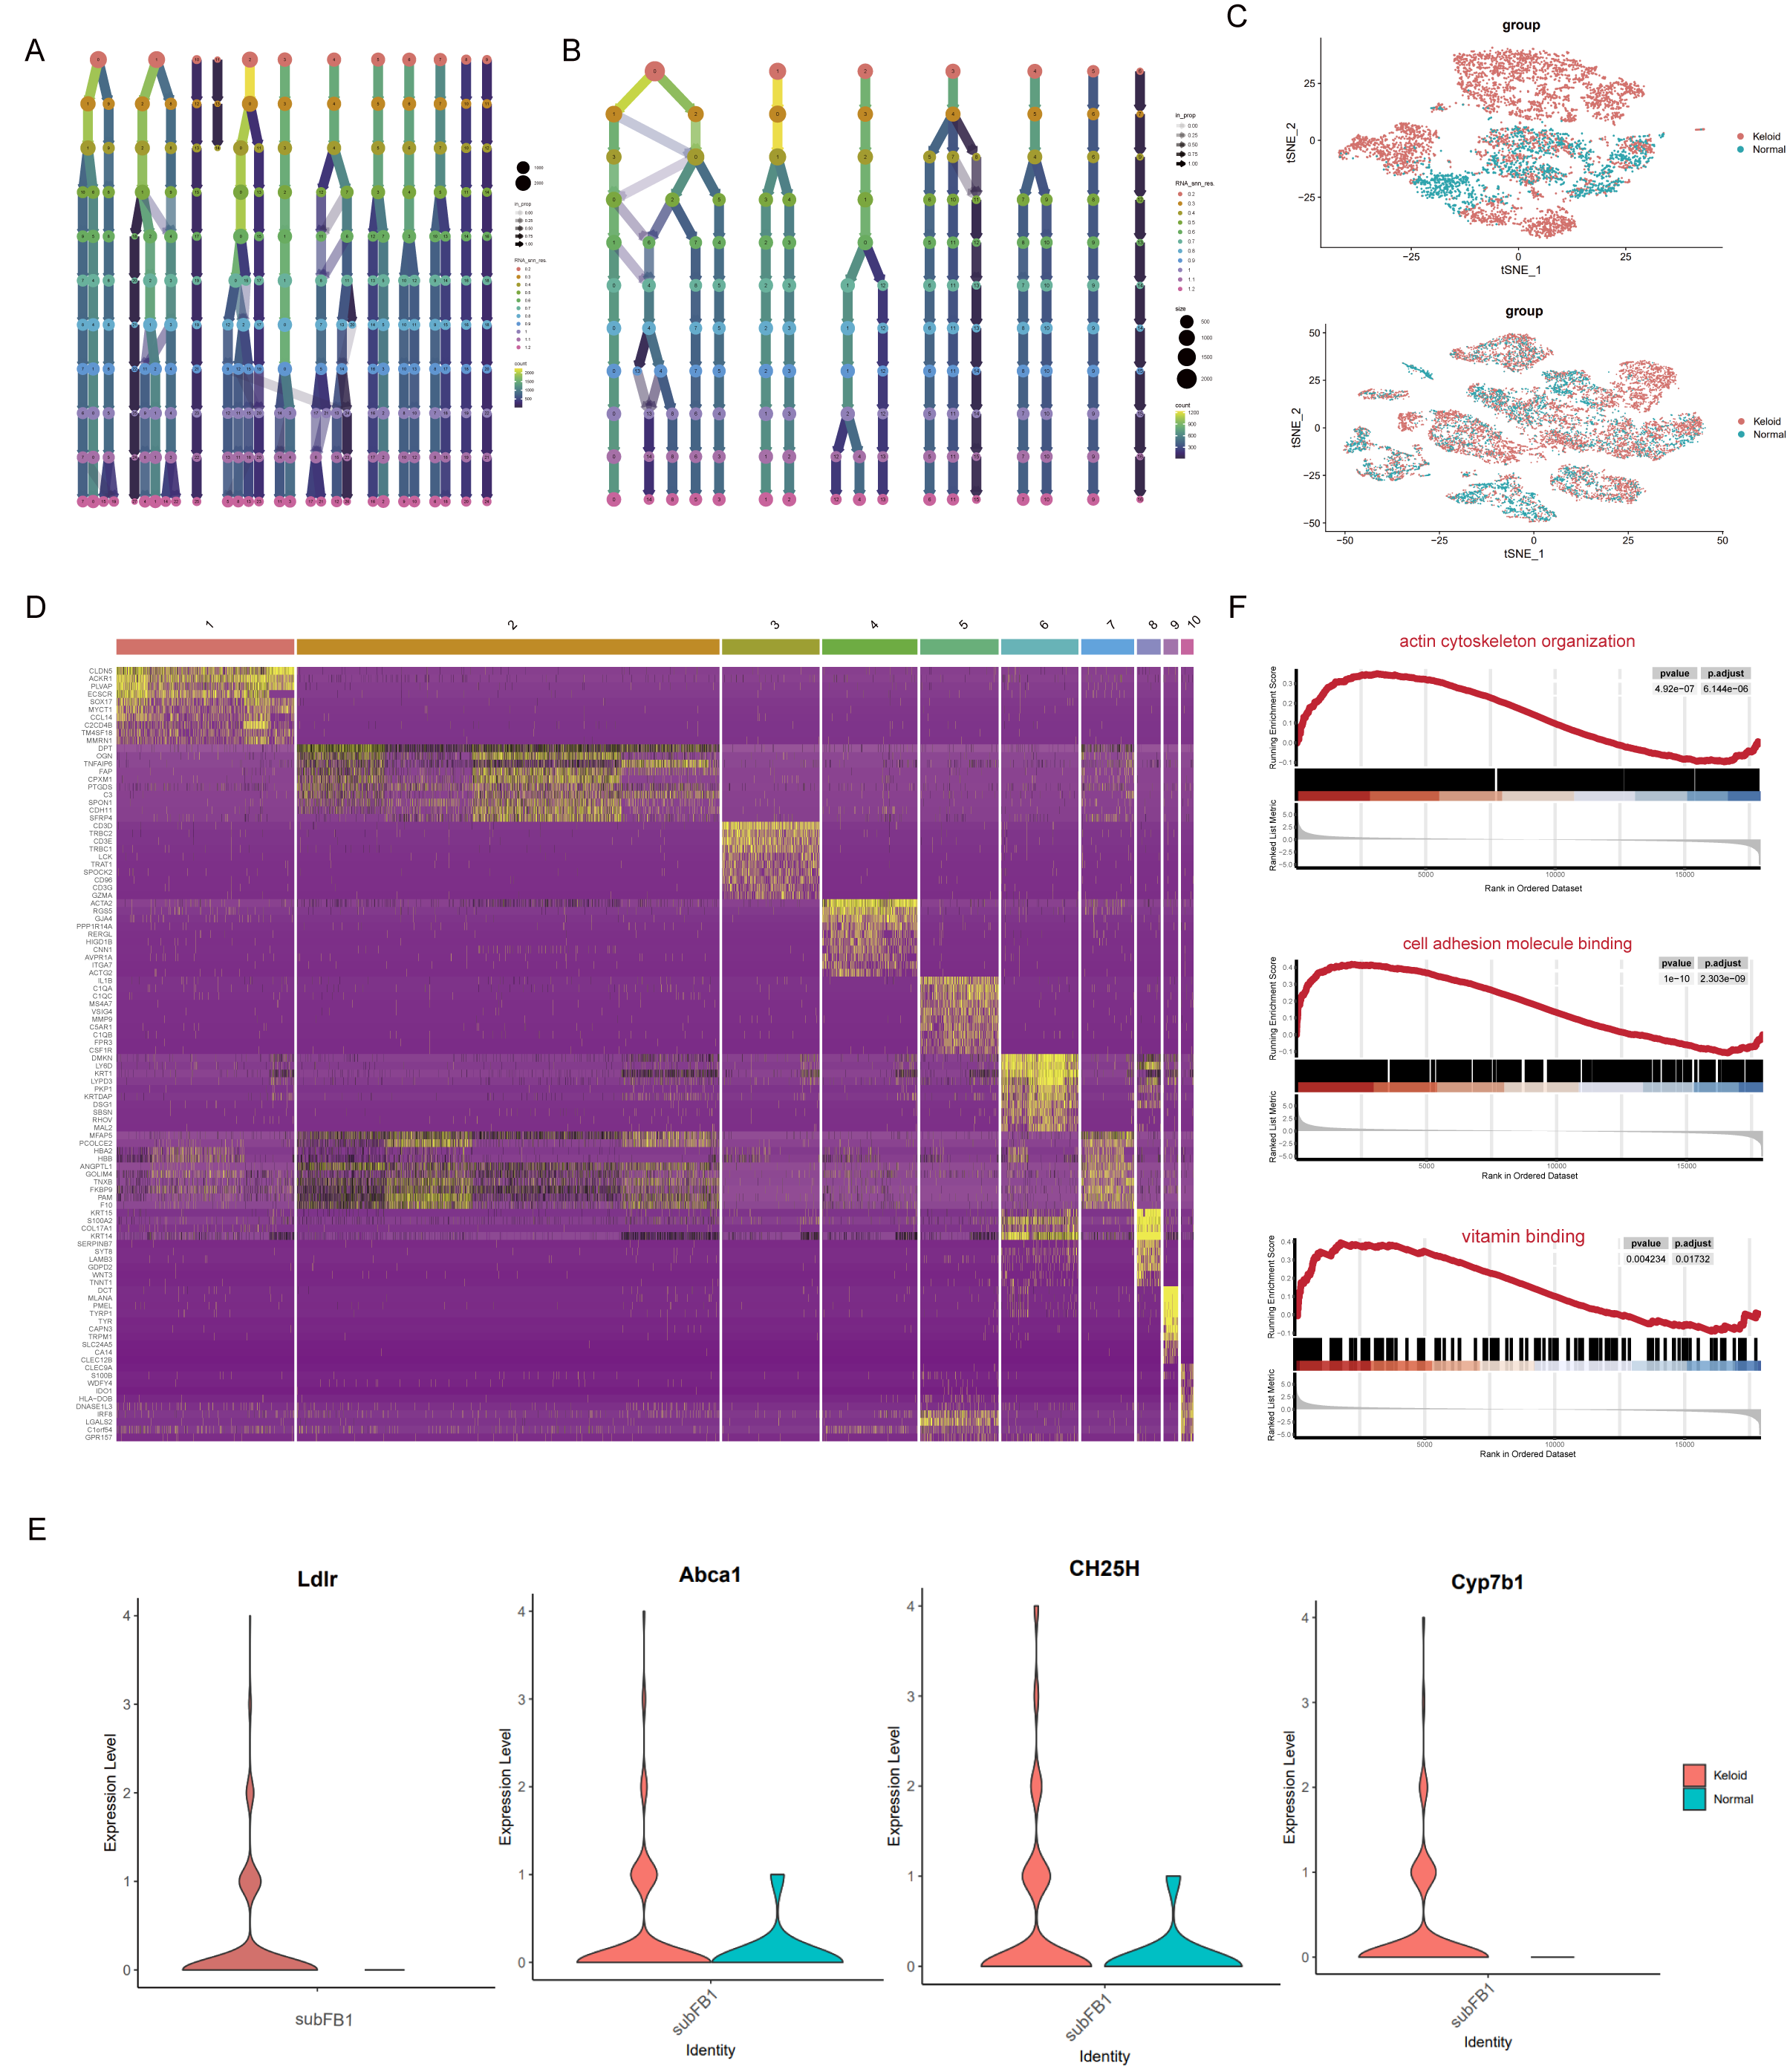
**

**Fig. S1 Single-cell RNA sequencing analysis of skin fibrosis. (A)** Comprehensive cell population clustering across diverse resolutions. **(B)** Fibroblast population clustering across diverse resolutions. **(C)** t-SNE visualizations illustrate comprehensive cell and fibroblast distributions across various clinical types. **(D)** Gene expression heatmap for the comprehensive cell population. **(E)** Violin plots of Ldlr and Abca1 in subFB1 across various clinical types. **(F)** Violin plots of Ch25h and Cyp7b1 in subFB1 across various clinical types.

**
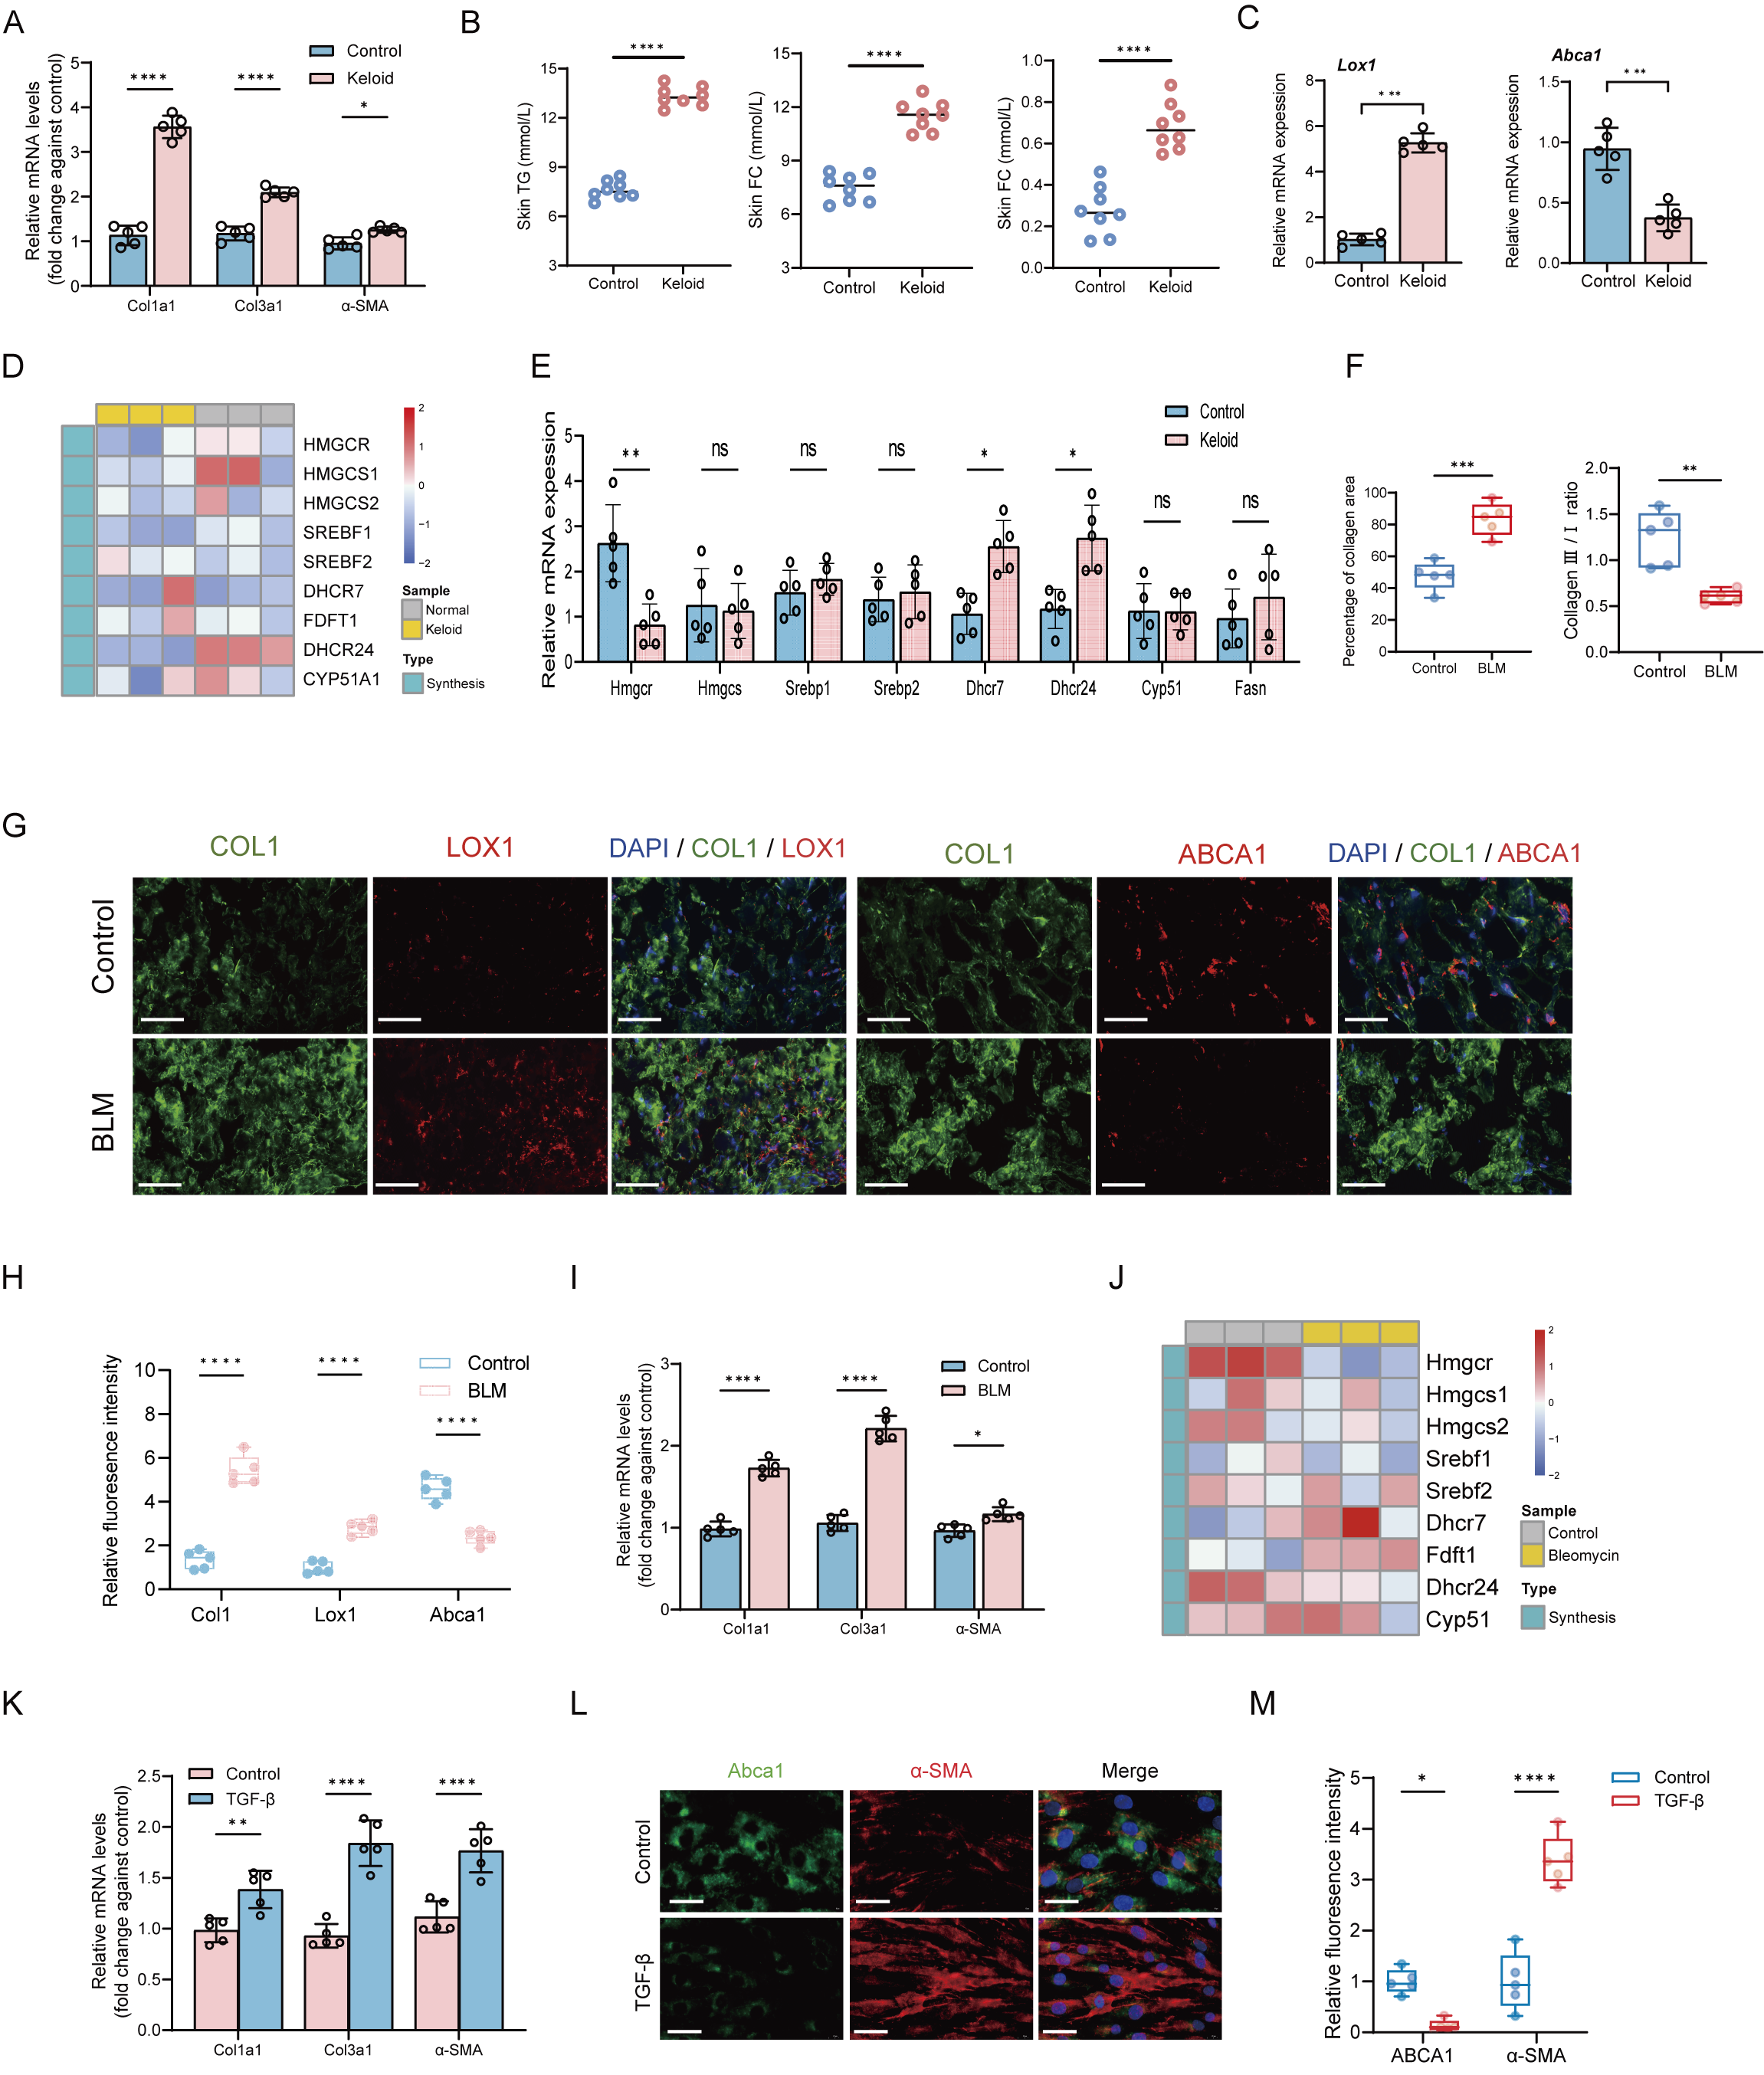
**

**Fig. S2 Dysregulation of** cholesterol homeostasis in skin fibroblasts from keloid lesions and BLM-treated mice. (A) In situ quantitative reverse transcription polymerase chain reaction (qRT‒PCR) analysis of Collagen type I alpha 1 (Col1a1), Collagen type III alpha 1 (Col3a1), and α-smooth muscle actin (α-SMA) was conducted in normal human skin and keloids. **(B)** The levels of skin triglycerides (TGs), total cholesterol (TC), and free cholesterol (FC) were measured in both normal human skin and keloids via an assay kit. **(C)** In situ qRT‒PCR was performed to evaluate the expression of lipoxygenase 1 (Lox1) and ATP-binding cassette transporter A1 (Abca1) in normal human skin and keloids. **(D)** A heatmap was generated to visualize the expression of factors involved in cholesterol biosynthesis in keloids. **(E)** In situ qRT‒PCR analysis was conducted on genes associated with cholesterol biosynthesis. **(F)** Percentage of collagen area and the collagen III/I ratio in the control and BLM-treated groups. **(G, H)** Immunofluorescence staining and relative fluorescence intensity measurements were performed for collagen type I (COL1, green) and ATP-binding cassette transporter A1 (ABCA1, red) in normal and BLM-treated mice (n=5). **(I)** In situ qRT‒PCR analysis of collagen type I alpha 1 (Col1a1), collagen type III alpha 1 (Col3a1), and α-smooth muscle actin (α-SMA) in the skin of normal and BLM-treated mice was performed. **(J)** A heatmap was created to illustrate the expression of factors related to cholesterol biosynthesis in the skin of BLM-treated mice. **(K)** Quantitative reverse transcription polymerase chain reaction (qRT‒PCR) was used to assess the expression levels of collagen type I alpha 1 (Col1a1), collagen type III alpha 1 (Col3a1), and α-smooth muscle actin (α-SMA) in human dermal fibroblasts. **(L, M)** Immunofluorescence staining and relative fluorescence intensity were analyzed for α-smooth muscle actin (α-SMA, red) and ATP-binding cassette transporter A1 (ABCA1, green).


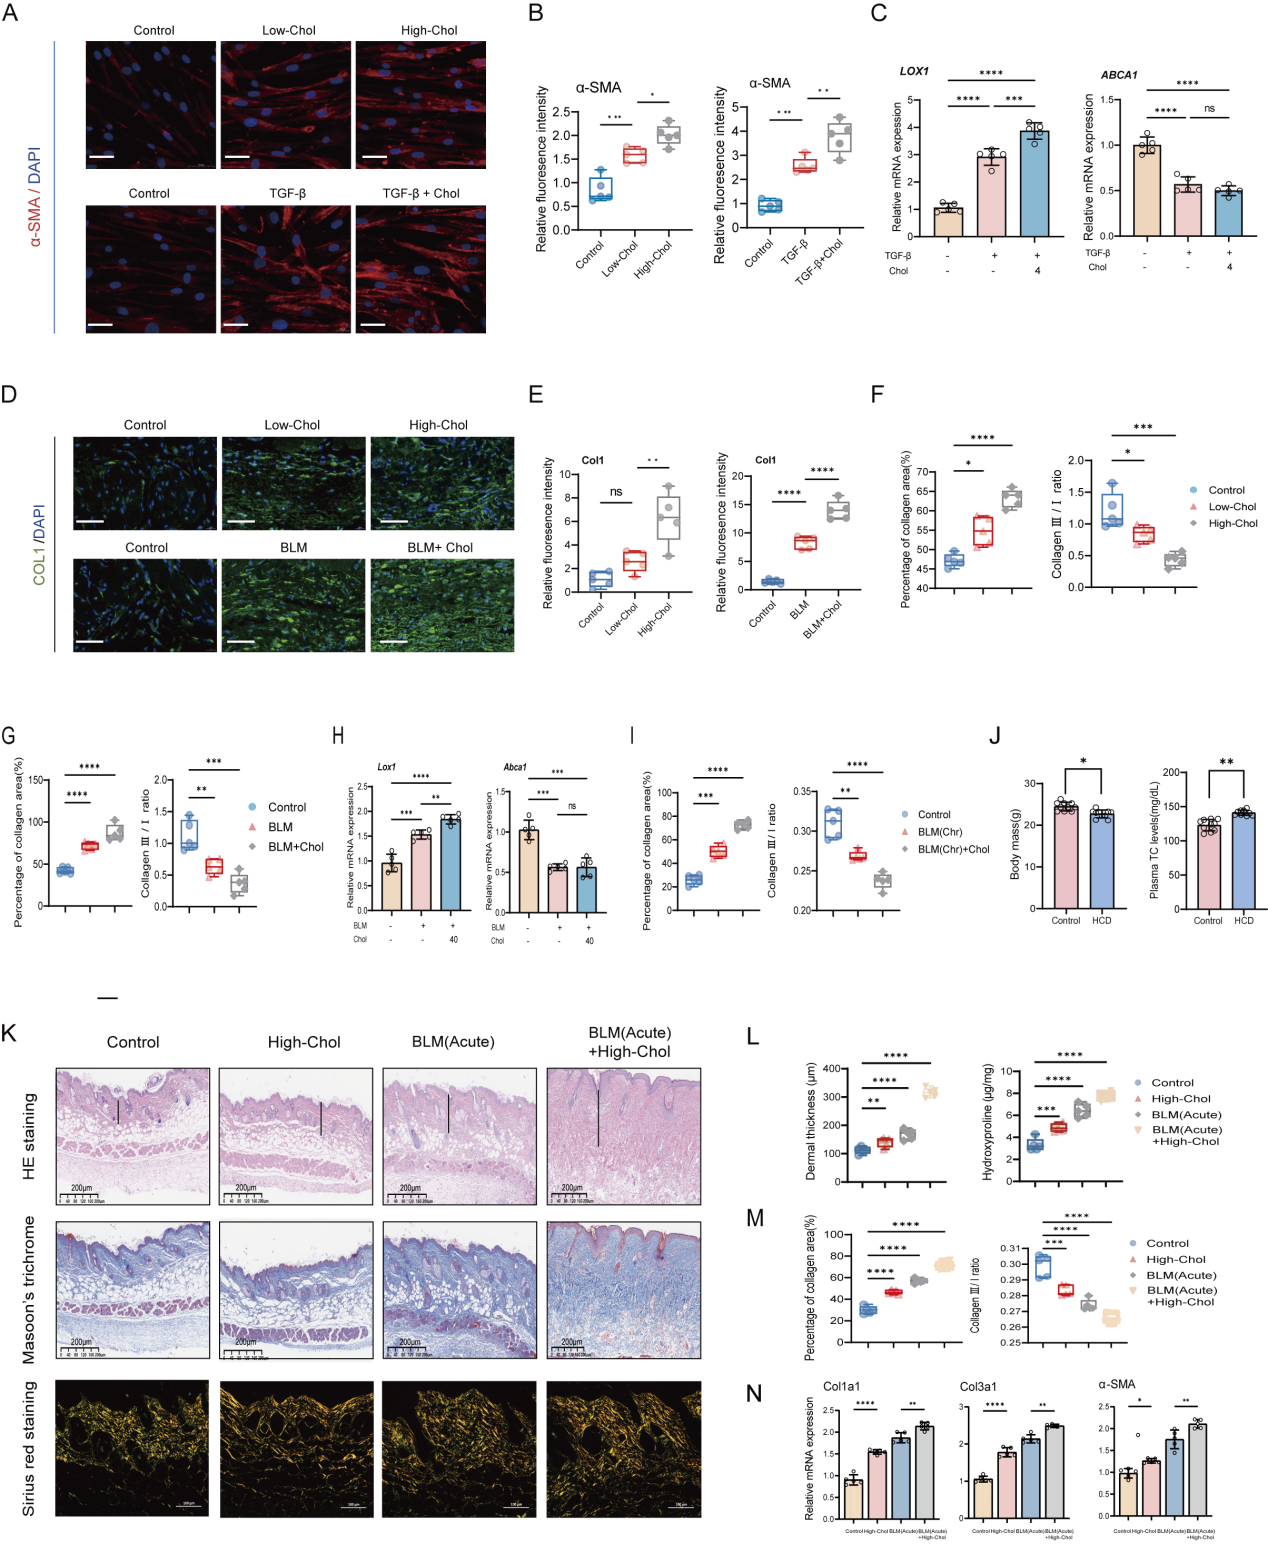


**Fig. S3** **Disruption of cholesterol homeostasis plays a pivotal role in the progression of skin fibrosis.** **(A, B)** Immunostaining and corresponding relative fluorescence intensity for α-smooth muscle actin (α-SMA, red) were performed on fibroblasts under normal conditions, as were those treated with low or high cholesterol levels, TGF-β1, and TGF-β1 combined with 40 μM cholesterol. **(C)** Quantitative PCR (qPCR) analysis was conducted to assess the expression levels of Lox1 and Abca1 in fibroblasts subjected to normal conditions, low- or high-cholesterol conditions, TGF-β1 treatment, and treatment with TGF-β1 combined with 40 μM cholesterol. **(D, E)** Immunostaining and corresponding relative fluorescence intensity for collagen type I (COL1, green) were analyzed in skin tissues from mice subjected to normal conditions, low- or high-cholesterol treatment, BLM treatment, and BLM combined with cholesterol treatment. **(F)** qPCR analysis was used to evaluate the expression levels of Lox1 and Abca1 in the skin tissues of mice subjected to normal conditions, low- or high-cholesterol treatment, BLM treatment, or BLM combined with cholesterol treatment. **(G)** In situ qPCR analysis was performed to determine the expression levels of Ch25h and Cyp7b1 in the skin tissues of mice treated with normal, low, or high cholesterol. **(H)** qPCR analysis was conducted to assess the expression levels of Ch25h and Cyp7b1 in fibroblasts treated with normal, low, or high cholesterol. Additionally, the levels of 25-HC were measured via a specific ELISA kit. **(I)** Percentage of collagen area and the collagen III/I ratio in the control, BLM (Chronic) and BLM (Chronic) + cholesterol groups. **(J)** Body mass and plasma total cholesterol (TC) levels in hypercholesterolemic mice fed a high-fat diet for eight weeks. **(K)** HE staining, Masson's trichrome staining, and Sirius red staining were performed on skin tissues from the control, high-Chol (cholesterol), BLM (acute), and BLM (acute) + high-Chol groups. **(L, M)** Dermal thickness, hydroxyproline concentration, percentage of collagen area and collagen III/I ratio in each group. (N) qRT‒PCR was used to assess the expression levels of Col1a1, Col3a1, and α-SMA in the control, high-Chol, BLM (acute), and BLM (acute) + high-Chol groups.


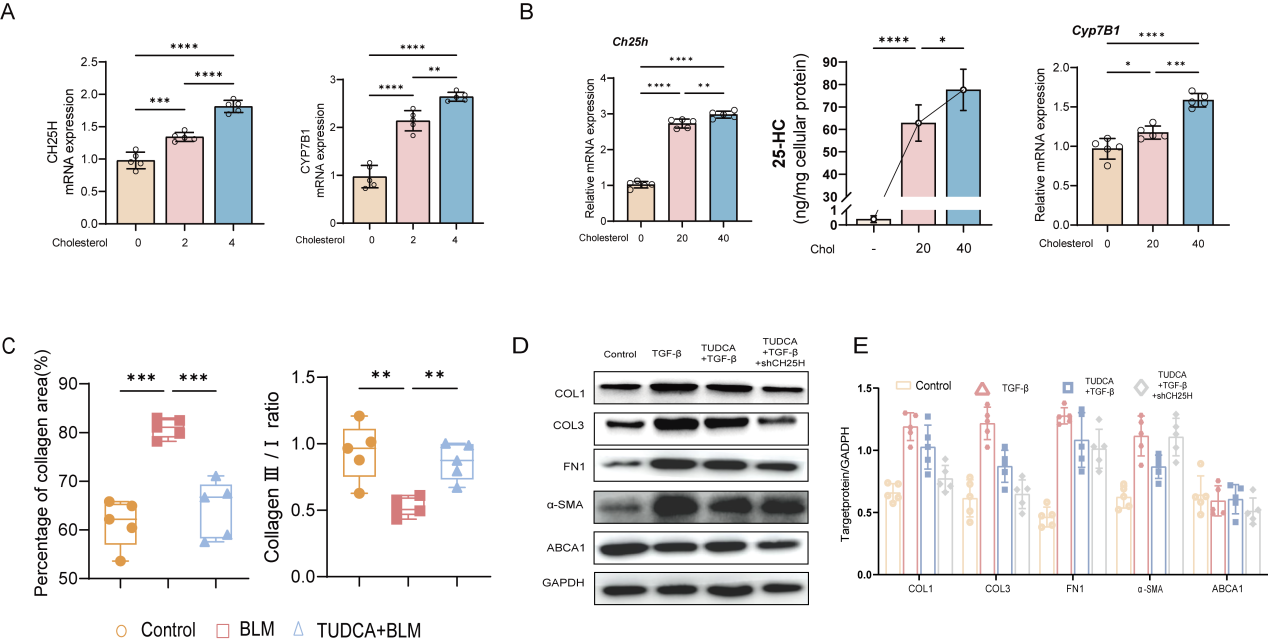


**Fig. S4** **Disruption of cholesterol homeostasis plays a pivotal role in the progression of skin fibrosis.** **(A)** In situ qPCR analysis was performed to determine the expression levels of Ch25h and Cyp7b1 in the skin tissues of mice treated with normal, low, or high cholesterol. **(B)** qPCR analysis was conducted to assess the expression levels of Ch25h and Cyp7b1 in fibroblasts treated with normal, low, or high cholesterol. Additionally, the levels of 25-HC were measured via a specific ELISA kit. (**C**) The percentage of collagen area and the collagen III/I ratio were measured in skin tissues from control, BLM-treated and BLM+TUDCA-treated mice. (**D**, **E**) Western blot of ABCA1, COL1A1, COL3A1, FN1 and α-SMA in control, TGF-β1-treated, TUDCA-treated and TUDCA+TGF-β1+shCH25H-treated FBs.
